# Supplementary material for: Ginsenoside Rg3 enriches SCFA-producing commensal bacteria to confer protection against enteric viral infection via the cGAS-STING-type I IFN axis
Source: PubMed Central journal article supplement (PMC10689736; doi:10.1038/s41396-023-01541-7), 2023-11-10

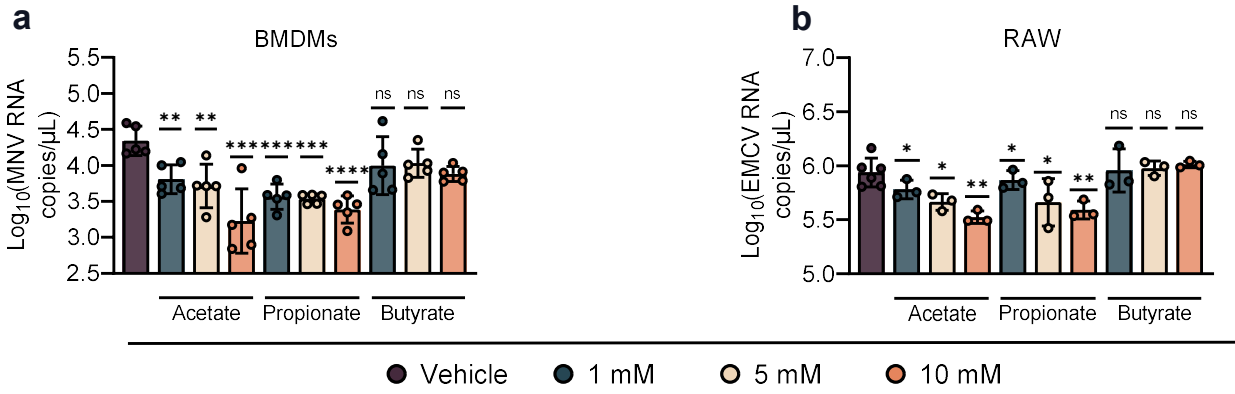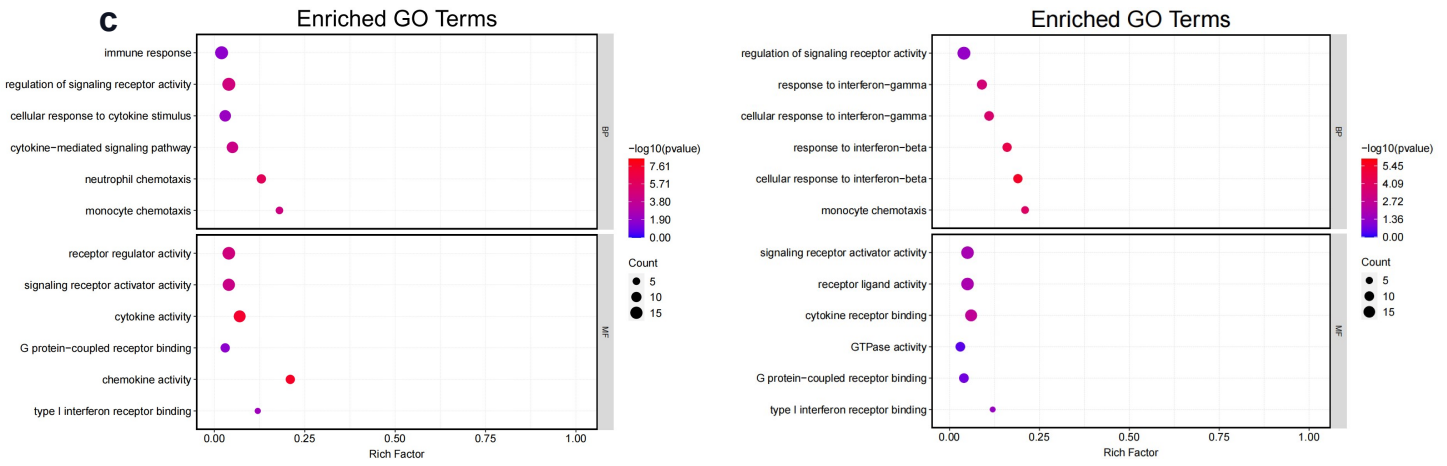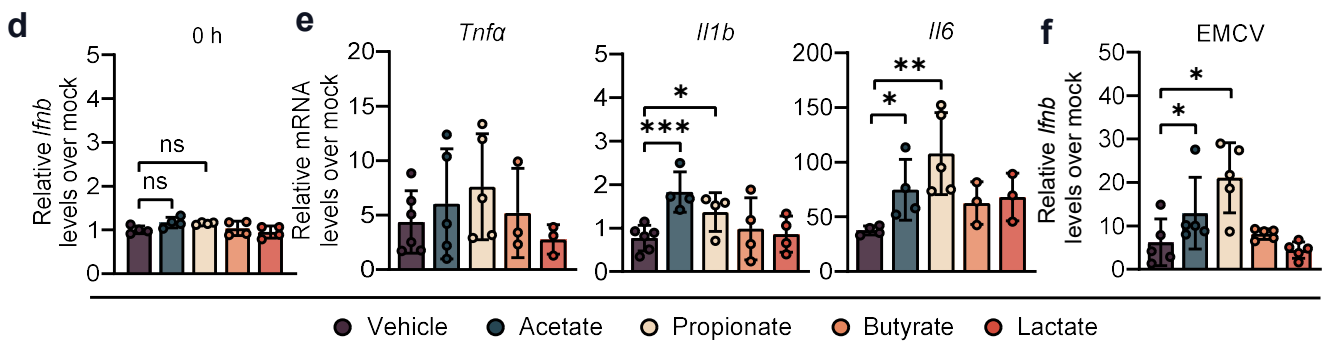

Supplement: 41396_2023_1541_MOESM5_ESM.pdf [file 41396_2023_1541_MOESM5_ESM.pdf]
